# Supplementary material
Source: PubMed Central journal article supplement (PMC4959100)
Supplement: supp_116.232876_Supplemental_232876.pdf [file supp_116.232876_Supplemental_232876.pdf]

**SUPPLEMENTAL DATA****Chiral plasma pharmacokinetics and urinary excretion of bupropion and metabolites in healthy volunteers.**

Andrea R. Masters, Brandon T. Gufford, Jessica Bo Li Lu, Ingrid F. Metzger, David R. Jones, and Zeruesenay Desta

Department of Medicine, Division of Clinical Pharmacology Indiana University School of Medicine, Indianapolis, Indiana

**The Journal of Pharmacology and Experimental Therapeutics****Supplemental Table 1.** Clinical study participant characteristics.

|                                            | <b>Men</b><br>(n=9) | <b>Women</b><br>(n=6) |
|--------------------------------------------|---------------------|-----------------------|
| <b>Age</b> (years), median [range]         | 22 [19-32]          | 27 [23-47]            |
| <b>Weight</b> (kg), mean (SD)              | 80 (12)             | 67 (11)               |
| <b>Height</b> (cm), mean (SD)              | 179 (5.7)           | 163 (9.4)             |
| <b>BMI</b> (kg/m <sup>2</sup> ), mean (SD) | 25 (2.7)            | 25 (1.4)              |
| <b>Self-identified race</b> (n)            |                     |                       |
| Caucasian                                  | 9                   | 3                     |
| African American                           | -                   | 1                     |
| Asian                                      | -                   | 2                     |
| Hispanic                                   | -                   | -                     |
